# Supplementary material for: People With High Autistic Traits Show Fewer Consensual Crossmodal Correspondences Between Visual Features and Tastes
Source: Front Psychol. 2021 Sep 8;12:714277. doi: 10.3389/fpsyg.2021.714277 (PMC8457010; doi:10.3389/fpsyg.2021.714277)
Supplement: Supplementary file 1 [file Data_Sheet_1.xlsx]

## Sheet: フォームの回答 1
タイムスタンプ	研究に関する説明や連絡先については、研究説明書（リンク先）をご覧ください。本アンケート調査への参加を承諾される場合，「同意する」を選択してください。https://drive.google.com/file/d/1KH5I3RRZKsfdRKhfNHOLaZBiHhkd_c79/view?usp=sharing	あなたの年齢を教えてください。	あなたの性別を教えてください。	あなた自身は、発達障害または、他の精神神経疾患などの診断を受けたことがありますか？該当する項目を選んでください（複数回答可）。	前の質問で「その他の精神神経疾患・障害」まだは「不明（未診断・疑うを含む）」を選択した方は、具体的な診断名（公的機関による判定を含む）をお答えください。	あなたの出身地を教えてください。	以下の色と最も合う味を一つだけ選んでください。	この選択はどれぐらい自信がありますか？	以下の色と最も合う味を一つだけ選んでください。	この選択はどれぐらい自信がありますか？	以下の色と最も合う味を一つだけ選んでください。	この選択はどれぐらい自信がありますか？	以下の色と最も合う味を一つだけ選んでください。	この選択はどれぐらい自信がありますか？	以下の色と最も合う味を一つだけ選んでください。	この選択はどれぐらい自信がありますか？	以下の色と最も合う味を一つだけ選んでください。	この選択はどれぐらい自信がありますか？	以下の色と最も合う味を一つだけ選んでください。	この選択はどれぐらい自信がありますか？	以下の色と最も合う味を一つだけ選んでください。	この選択はどれぐらい自信がありますか？	以下の色と最も合う味を一つだけ選んでください。	この選択はどれぐらい自信がありますか？	以下の色と最も合う味を一つだけ選んでください。	この選択はどれぐらい自信がありますか？	以下の色と最も合う味を一つだけ選んでください。	この選択はどれぐらい自信がありますか？	以下の形と最も合う味を一つだけ選んでください。	この選択はどれぐらい自信がありますか？	以下の形と最も合う味を一つだけ選んでください。	この選択はどれぐらい自信がありますか？	以下の形と最も合う味を一つだけ選んでください。	この選択はどれぐらい自信がありますか？	以下の形と最も合う味を一つだけ選んでください。	この選択はどれぐらい自信がありますか？	以下の形と最も合う味を一つだけ選んでください。	この選択はどれぐらい自信がありますか？	以下の形と最も合う味を一つだけ選んでください。	この選択はどれぐらい自信がありますか？	以下の形と最も合う味を一つだけ選んでください。	この選択はどれぐらい自信がありますか？	以下の形と最も合う味を一つだけ選んでください。	この選択はどれぐらい自信がありますか？	以下の形と最も合う味を一つだけ選んでください。	この選択はどれぐらい自信がありますか？	以下の形と最も合う味を一つだけ選んでください。	この選択はどれぐらい自信がありますか？	以下の形と最も合う味を一つだけ選んでください。
2020-11-18 19:15:44	同意する	40〜49歳	女性	診断なし（概ね定型発達）		中部	酸味	2	苦味	2	酸味	1	塩味	1	旨味	1	旨味	2	甘味	3	塩味	2	酸味	2	酸味	2	塩味	2	旨味	3	苦味	3	甘味	1	苦味	2	甘味	3	甘味	2	酸味	2	塩味	2	旨味	2	塩味	1	塩味
2020-11-18 19:54:16	同意する	40〜49歳	男性	診断なし（概ね定型発達）		近畿	酸味	3	甘味	1	苦味	2	塩味	1	苦味	1	甘味	1	甘味	2	旨味	1	酸味	3	苦味	1	塩味	1	旨味	2	塩味	3	塩味	1	酸味	3	甘味	3	旨味	1	苦味	2	塩味	2	旨味	1	甘味	1	苦味
2020-11-18 21:39:51	同意する	60歳以上	女性	診断なし（概ね定型発達）		関東	旨味	3	甘味	3	旨味	3	旨味	3	旨味	3	苦味	3	甘味	3	旨味	3	酸味	3	甘味	3	塩味	3	甘味	3	塩味	3	旨味	3	旨味	3	甘味	3	旨味	3	酸味	3	塩味	3	旨味	3	塩味	3	酸味
2020-11-18 22:17:28	同意する	50〜59歳	男性	診断なし（概ね定型発達）		北海道	苦味	2	苦味	3	旨味	3	酸味	3	酸味	3	塩味	4	甘味	4	塩味	3	酸味	3	苦味	3	苦味	2	甘味	4	塩味	4	塩味	3	塩味	4	甘味	3	甘味	3	塩味	4	旨味	2	旨味	3	酸味	2	塩味
2020-11-19 09:13:16	同意する	50〜59歳	男性	診断なし（概ね定型発達）		関東	酸味	3	苦味	3	塩味	3	苦味	3	旨味	3	甘味	3	甘味	3	塩味	3	酸味	3	甘味	3	苦味	3	甘味	3	酸味	3	塩味	3	酸味	3	甘味	3	甘味	3	酸味	3	塩味	3	旨味	3	酸味	3	苦味
2020-11-19 10:49:54	同意する	40〜49歳	男性	診断なし（概ね定型発達）		関東	旨味	4	苦味	5	塩味	4	苦味	5	苦味	5	甘味	5	酸味	5	塩味	5	旨味	4	苦味	5	塩味	4	旨味	5	塩味	5	苦味	3	甘味	3	酸味	4	旨味	4	塩味	3	苦味	3	旨味	3	塩味	4	苦味
2020-11-19 14:51:22	同意する	50〜59歳	男性	診断なし（概ね定型発達）		関東	甘味	2	旨味	2	酸味	3	酸味	2	苦味	4	旨味	3	甘味	4	旨味	2	酸味	3	甘味	3	苦味	2	甘味	2	塩味	2	酸味	1	酸味	2	甘味	3	甘味	3	酸味	4	塩味	1	甘味	4	酸味	3	塩味
2020-11-19 20:33:27	同意する	40〜49歳	女性	診断なし（概ね定型発達）		関東	塩味	3	塩味	5	甘味	2	苦味	2	塩味	3	旨味	3	甘味	3	甘味	1	酸味	2	甘味	2	苦味	1	甘味	2	酸味	1	旨味	2	酸味	1	甘味	1	旨味	2	塩味	2	旨味	2	甘味	2	塩味	1	旨味
2020-11-20 11:20:34	同意する	40〜49歳	女性	診断なし（概ね定型発達）		関東	酸味	4	苦味	4	旨味	4	酸味	4	苦味	4	旨味	4	甘味	4	旨味	4	甘味	4	酸味	4	塩味	4	甘味	4	塩味	4	旨味	4	酸味	4	甘味	4	旨味	4	苦味	4	旨味	4	甘味	5	酸味	4	旨味
2020-11-20 20:26:10	同意する	40〜49歳	女性	診断なし（概ね定型発達）		関東	塩味	4	酸味	3	旨味	5	酸味	5	苦味	5	旨味	5	酸味	4	塩味	5	酸味	5	甘味	5	苦味	3	甘味	5	酸味	4	苦味	4	苦味	4	甘味	5	甘味	5	苦味	4	塩味	2	旨味	4	酸味	2	塩味
2020-11-24 00:34:54	同意する	30〜39歳	女性	学習障害, その他の精神神経疾患・障害	周期生嘔吐症	東北	酸味	3	旨味	3	甘味	3	塩味	3	苦味	4	旨味	2	甘味	3	塩味	2	旨味	3	苦味	3	塩味	2	甘味	4	酸味	4	塩味	3	酸味	3	甘味	4	旨味	3	酸味	3	甘味	2	甘味	3	旨味	2	旨味
2020-11-24 10:35:11	同意する	30〜39歳	女性	診断なし（概ね定型発達）		東北	酸味	5	苦味	5	酸味	2	塩味	2	苦味	3	旨味	2	甘味	5	塩味	1	酸味	2	甘味	4	塩味	1	旨味	3	苦味	3	塩味	1	酸味	3	甘味	4	旨味	5	酸味	5	塩味	3	旨味	4	甘味	1	苦味
2020-11-26 20:42:00	同意する	50〜59歳	女性	診断なし（概ね定型発達）		中部	酸味	1	苦味	2	甘味	2	塩味	1	苦味	1	旨味	1	甘味	2	塩味	2	酸味	2	旨味	1	苦味	2	旨味	2	酸味	1	酸味	1	旨味	2	甘味	3	旨味	2	苦味	2	塩味	2	旨味	1	酸味	1	苦味
2020-11-27 17:10:34	同意する	20〜29歳	女性	診断なし（概ね定型発達）		関東	酸味	5	苦味	4	甘味	4	塩味	5	苦味	5	旨味	5	甘味	5	塩味	3	旨味	2	苦味	2	苦味	1	甘味	5	酸味	5	塩味	1	酸味	5	甘味	5	甘味	4	酸味	5	塩味	2	甘味	2	酸味	2	塩味
2020-11-27 17:13:35	同意する	20〜29歳	女性	診断なし（概ね定型発達）		近畿	酸味	4	旨味	3	旨味	3	塩味	4	苦味	5	旨味	3	塩味	3	塩味	2	旨味	4	甘味	4	塩味	4	塩味	2	酸味	4	苦味	2	旨味	2	甘味	2	酸味	3	苦味	2	酸味	2	旨味	2	酸味	3	塩味
2020-11-27 17:22:31	同意する	20〜29歳	女性	診断なし（概ね定型発達）		近畿	酸味	4	苦味	3	酸味	4	苦味	2	苦味	4	旨味	4	甘味	2	塩味	4	酸味	4	旨味	3	塩味	4	旨味	4	酸味	3	塩味	3	酸味	2	甘味	3	甘味	3	酸味	4	旨味	2	甘味	3	甘味	3	旨味
2020-11-27 18:03:35	同意する	20〜29歳	男性	診断なし（概ね定型発達）		関東	酸味	5	苦味	5	酸味	2	塩味	3	塩味	3	旨味	3	甘味	4	塩味	3	酸味	3	甘味	2	塩味	3	塩味	2	苦味	2	塩味	3	旨味	3	甘味	4	甘味	2	苦味	4	塩味	3	旨味	2	塩味	2	塩味
2020-11-27 18:20:37	同意する	50〜59歳	女性	診断なし（概ね定型発達）		関東	塩味	3	苦味	3	旨味	2	酸味	3	甘味	3	旨味	2	甘味	3	甘味	3	酸味	3	酸味	3	旨味	2	甘味	4	塩味	3	旨味	3	塩味	3	甘味	3	甘味	3	苦味	4	旨味	2	甘味	2	旨味	2	甘味
2020-11-27 18:20:44	同意する	30〜39歳	男性	診断なし（概ね定型発達）		九州・沖縄	旨味	3	苦味	3	甘味	3	酸味	4	苦味	4	旨味	4	甘味	4	塩味	5	酸味	4	酸味	4	塩味	4	甘味	3	塩味	3	塩味	3	酸味	4	甘味	3	苦味	4	旨味	5	塩味	4	甘味	4	苦味	4	甘味
2020-11-27 18:29:30	同意する	20〜29歳	女性	診断なし（概ね定型発達）		北海道	酸味	4	酸味	2	甘味	2	酸味	3	苦味	4	苦味	4	甘味	5	塩味	3	酸味	3	苦味	3	苦味	2	旨味	2	酸味	1	旨味	1	塩味	1	甘味	3	旨味	1	塩味	1	塩味	1	酸味	1	塩味	2	酸味
2020-11-27 18:50:06	同意する	20〜29歳	女性	診断なし（概ね定型発達）		九州・沖縄	酸味	2	苦味	2	旨味	2	苦味	2	塩味	1	甘味	1	旨味	1	塩味	1	酸味	3	苦味	3	苦味	2	甘味	2	苦味	2	塩味	1	酸味	3	旨味	3	旨味	1	苦味	4		1	旨味	2	苦味	1	苦味
2020-11-27 18:52:52	同意する	30〜39歳	女性	その他の精神神経疾患・障害	うつ病	関東	酸味	4	苦味	3	塩味	3	旨味	2	塩味	1	甘味	2	甘味	4	塩味	3	甘味	3	甘味	2	苦味	2	甘味	3	酸味	4	旨味	3	塩味	3	甘味	3	旨味	3	酸味	4	旨味	2	甘味	2	旨味	2	苦味
2020-11-27 20:09:09	同意する	30〜39歳	女性	診断なし（概ね定型発達）		中部	酸味	4	苦味	2	旨味	1	塩味	1	苦味	1	旨味	1	甘味	3	塩味	1	酸味	3	苦味	1	塩味	1	甘味	3	塩味	2	苦味	2	酸味	4	甘味	4	甘味	4	酸味	4	塩味	3	甘味	2	酸味	2	塩味
2020-11-27 20:13:48	同意する	40〜49歳	女性	自閉症スペクトラム症（自閉症・アスベルガー症候群・広汎性発達障害を含む）, 注意欠陥多動性障害, その他の精神神経疾患・障害	うつ病、不安障害	関東	酸味	4	苦味	3	塩味	3	苦味	2	苦味	3	旨味	4	甘味	4	塩味	2	酸味	3	苦味	2	塩味	2	甘味	3	塩味	2	苦味	1	酸味	3	甘味	4	甘味	3	酸味	3	塩味	2	旨味	2	苦味	3	苦味
2020-11-27 20:15:51	同意する	20〜29歳	女性	診断なし（概ね定型発達）		九州・沖縄	酸味	5	苦味	4	塩味	1	塩味	3	苦味	1	旨味	2	甘味	2	塩味	5	酸味	4	甘味	1	苦味	1	甘味	3	酸味	4	旨味	2	酸味	3	旨味	3	塩味	1	酸味	2	酸味	1	塩味	1	酸味	2	旨味
2020-11-27 20:18:42	同意する	20〜29歳	女性	診断なし（概ね定型発達）		四国	酸味	4	苦味	4	苦味	2	苦味	1	苦味	1	旨味	3	甘味	4	甘味	4	酸味	4	苦味	1	塩味	3	甘味	2	苦味	1	旨味	1	旨味	1	甘味	2	甘味	3	酸味	2	旨味	1	旨味	1	甘味	1	甘味
2020-11-27 20:53:27	同意する	40〜49歳	女性	診断なし（概ね定型発達）		関東	酸味	4	苦味	4	甘味	4	塩味	4	苦味	4	苦味	2	甘味	5	塩味	4	苦味	3	塩味	4	苦味	1	甘味	5	酸味	3	塩味	1	塩味	3	甘味	4	旨味	3	塩味	4	旨味	4	甘味	3	酸味	3	塩味
2020-11-27 21:29:41	同意する	20〜29歳	女性	診断なし（概ね定型発達）		九州・沖縄	酸味	4	苦味	4	塩味	3	苦味	3	旨味	2	旨味	3	甘味	4	塩味	4	酸味	4	甘味	4	塩味	3	旨味	3	酸味	4	苦味	3	酸味	3	甘味	5	塩味	2	塩味	3	旨味	2	甘味	2	甘味	2	旨味
2020-11-27 23:44:01	同意する	20〜29歳	女性	診断なし（概ね定型発達）		関東	酸味	4	旨味	2	旨味	3	苦味	2	苦味	4	苦味	2	旨味	4	塩味	4	旨味	3	甘味	2	苦味	2	甘味	3	酸味	3	塩味	4	酸味	4	甘味	3	塩味	4	酸味	3	塩味	4	甘味	3	塩味	4	苦味
2020-11-28 08:19:16	同意する	20〜29歳	女性	診断なし（概ね定型発達）		関東	酸味	5	苦味	5	酸味	3	旨味	3	苦味	3	旨味	2	甘味	5	塩味	5	酸味	2	甘味	2	塩味	3	甘味	3	酸味	3	塩味	1	酸味	3	甘味	5	甘味	2	苦味	3	塩味	4	旨味	1	塩味	1	旨味
2020-11-28 10:39:36	同意する	20〜29歳	女性	診断なし（概ね定型発達）		九州・沖縄	酸味	5	苦味	5	旨味	4	塩味	5	苦味	3	旨味	4	甘味	5	塩味	5	酸味	5	苦味	2	塩味	2	旨味	4	苦味	4	旨味	4	塩味	2	甘味	5	旨味	2	苦味	5	塩味	2	旨味	4	旨味	2	甘味
2020-11-28 11:24:04	同意する	40〜49歳	男性	診断なし（概ね定型発達）		九州・沖縄	酸味	4	苦味	4	甘味	4	甘味	4	塩味	3	塩味	3	甘味	4	塩味	3	酸味	4	甘味	4	苦味	1	旨味	3	塩味	3	塩味	2	塩味	3	甘味	3	甘味	3	酸味	3	塩味	3	旨味	3	苦味	2	苦味
2020-11-28 16:06:35	同意する	20〜29歳	女性	診断なし（概ね定型発達）		九州・沖縄	酸味	5	苦味	5	旨味	4	塩味	5	苦味	3	旨味	4	甘味	5	塩味	5	酸味	5	苦味	2	塩味	2	旨味	4	苦味	4	旨味	4	塩味	2	甘味	5	旨味	2	苦味	5	塩味	2	旨味	4	旨味	2	甘味
2020-11-28 21:48:39	同意する	20〜29歳	女性	診断なし（概ね定型発達）		関東	酸味	5	苦味	4	甘味	2	苦味	2	苦味	3	旨味	2	甘味	4	塩味	3	酸味	3	苦味	2	塩味	1	甘味	2	酸味	3	塩味	2	酸味	2	甘味	2	塩味	1	酸味	2	苦味	1	甘味	1	塩味	1	苦味
2020-11-28 22:54:15	同意する	20〜29歳	女性	診断なし（概ね定型発達）		関東	旨味	3	苦味	5	塩味	5	苦味	3	甘味	3	苦味	3	甘味	3	塩味	3	旨味	3	酸味	4	苦味	4	旨味	3	塩味	3	苦味	3	塩味	3	甘味	5	旨味	4	酸味	4	旨味	4	甘味	5	酸味	3	塩味
2020-11-29 08:45:07	同意する	20〜29歳	女性	診断なし（概ね定型発達）		関東	酸味	3	苦味	2	旨味	4	塩味	3	苦味	4	苦味	2	甘味	4	塩味	3	旨味	4	酸味	2	塩味	2	甘味	2	酸味	4	塩味	2	旨味	3	甘味	4	苦味	1	酸味	3	旨味	3	甘味	4	酸味	2	苦味
2020-11-29 10:38:08	同意する	30〜39歳	女性	診断なし（概ね定型発達）		関東	酸味	5	苦味	4	塩味	3	塩味	4	苦味	4	甘味	2	甘味	2	甘味	2	酸味	3	酸味	2	塩味	2	旨味	2	苦味	2	塩味	2	旨味	4	甘味	4	甘味	2	酸味	4	塩味	2	旨味	2	苦味	2	苦味
2020-11-29 10:51:25	同意する	20〜29歳	女性	診断なし（概ね定型発達）		中部	酸味	3	苦味	4	塩味	3	酸味	2	苦味	4	甘味	4	甘味	4	塩味	3	甘味	4	甘味	4	塩味	1	甘味	4	酸味	3	苦味	2	酸味	4	旨味	3	甘味	3	酸味	5	旨味	3	甘味	4	苦味	3	苦味
2020-11-29 14:52:09	同意する	20〜29歳	男性	自閉症スペクトラム症（自閉症・アスベルガー症候群・広汎性発達障害を含む）		関東	酸味	4	苦味	3	塩味	4	塩味	3	苦味	4	旨味	4	酸味	4	塩味	3	酸味	5	苦味	3	苦味	3	塩味	3	酸味	3	旨味	4	旨味	2	甘味	4	苦味	2	苦味	1	塩味	2	旨味	1	塩味	1	酸味
2020-11-29 14:53:38	同意する	20〜29歳	女性	診断なし（概ね定型発達）		北海道	酸味	5	苦味	4	旨味	3	苦味	3	苦味	3	旨味	4	甘味	4	塩味	3	旨味	3	旨味	4	苦味	4	甘味	3	酸味	3	塩味	3	酸味	4	旨味	3	旨味	4	塩味	4	塩味	3	旨味	3	塩味	3	塩味
2020-11-29 16:23:45	同意する	20〜29歳	女性	診断なし（概ね定型発達）		近畿	旨味	4	苦味	3	旨味	3	塩味	1	苦味	2	苦味	2	酸味	3	塩味	2	旨味	3	苦味	2	酸味	3	甘味	1	酸味	2	塩味	2	酸味	2	甘味	1	苦味	1	酸味	2	酸味	2	旨味	2	甘味	1	塩味
2020-11-29 20:15:32	同意する	20〜29歳	男性	自閉症スペクトラム症（自閉症・アスベルガー症候群・広汎性発達障害を含む）	広汎性発達障害	関東	酸味	4	苦味	3	旨味	4	塩味	4	塩味	4	旨味	4	甘味	4	塩味	4	酸味	3	苦味	4	塩味	4	旨味	4	酸味	4	塩味	4	酸味	4	甘味	4	甘味	4	酸味	4	塩味	4	旨味	4	甘味	4	苦味
2020-11-29 20:23:47	同意する	20〜29歳	女性	その他の精神神経疾患・障害	パニック障害	関東	酸味	4	苦味	3	旨味	2	苦味	4	苦味	4	甘味	5	甘味	4	塩味	5	酸味	5	甘味	3	苦味	4	甘味	3	塩味	4	旨味	2	甘味	4	甘味	4	甘味	4	酸味	3	甘味	4	旨味	4	酸味	3	塩味
2020-11-29 21:40:36	同意する	20〜29歳	女性	診断なし（概ね定型発達）		北海道	酸味	5	苦味	4	旨味	3	苦味	3	苦味	3	旨味	4	甘味	4	塩味	3	旨味	3	旨味	4	苦味	4	甘味	3	酸味	3	塩味	3	酸味	4	旨味	3	旨味	4	塩味	4	塩味	3	旨味	3	塩味	3	塩味
2020-12-01 10:58:08	同意する	30〜39歳	女性	診断なし（概ね定型発達）		近畿	塩味	4	旨味	4	苦味	2	苦味	2	苦味	3	苦味	3	甘味	4	酸味	3	旨味	3	酸味	2	苦味	3	旨味	3	酸味	4	苦味	3	酸味	4	甘味	4	旨味	4	酸味	3	塩味	3	旨味	3	酸味	2	苦味
2020-12-01 11:11:49	同意する	50〜59歳	女性	診断なし（概ね定型発達）		関東	酸味	5	苦味	4	旨味	3	塩味	4	苦味	4	甘味	3	甘味	4	塩味	4	酸味	5	塩味	3	塩味	3	塩味	3	酸味	4	旨味	4	甘味	3	甘味	5	旨味	4	酸味	4	旨味	4	旨味	3	塩味	3	旨味
2020-12-01 15:59:49	同意する	40〜49歳	男性	診断なし（概ね定型発達）		北海道	苦味	2	苦味	3	甘味	2	塩味	1	苦味	1	甘味	2	甘味	3	旨味	1	甘味	3	甘味	1	塩味	1	甘味	3	酸味	3	旨味	1	酸味	2	甘味	3	甘味	2	酸味	3	旨味	2	旨味	3	酸味	1	旨味
2020-12-02 14:36:16	同意する	30〜39歳	女性	診断なし（概ね定型発達）		関東	酸味	4	苦味	2	塩味	2	苦味	3	旨味	3	旨味	3	甘味	2	塩味	4	酸味	3	甘味	2	旨味	1	甘味	2	酸味	3	塩味	3	酸味	3	甘味	4	甘味	3	酸味	4	塩味	3	塩味	2	旨味	3	塩味
2020-12-09 08:04:33	同意する	15〜19歳	女性	診断なし（概ね定型発達）		北海道	甘味	3	苦味	2	旨味	3	塩味	3	苦味	2	甘味	3	甘味	2	塩味	2	甘味	2	酸味	2	塩味	2	旨味	2	酸味	2	旨味	2	塩味	2	甘味	2	甘味	2	酸味	2	酸味	2	旨味	2	酸味	2	苦味
2020-12-09 13:14:12	同意する	20〜29歳	男性	診断なし（概ね定型発達）		関東	酸味	5	苦味	5	旨味	3	苦味	4	苦味	3	旨味	4	甘味	5	塩味	4	酸味	4	苦味	4	苦味	3	甘味	2	酸味	2	苦味	2	酸味	4	甘味	4	甘味	4	酸味	4	苦味	3	甘味	3	酸味	3	甘味
2020-12-09 13:14:25	同意する	20〜29歳	男性	診断なし（概ね定型発達）		関東	酸味	5	苦味	5	旨味	3	苦味	4	苦味	3	旨味	4	甘味	5	塩味	4	酸味	4	苦味	4	苦味	3	甘味	2	酸味	2	苦味	2	酸味	4	甘味	4	甘味	4	酸味	4	苦味	3	甘味	3	酸味	3	甘味
2020-12-09 13:20:33	同意する	15〜19歳	女性	診断なし（概ね定型発達）		関東	酸味	4	苦味	5	酸味	2	塩味	2	苦味	4	旨味	2	甘味	5	塩味	3	酸味	4	苦味	3	苦味	2	旨味	4	塩味	4	塩味	4	酸味	4	甘味	4	甘味	3	酸味	4	旨味	3	旨味	3	旨味	3	旨味
2020-12-09 13:23:00	同意する	15〜19歳	女性	診断なし（概ね定型発達）		関東	酸味	3	苦味	2	酸味	2	塩味	3	苦味	2	甘味	4	甘味	4	塩味	4	酸味	4	苦味	2	酸味	2	甘味	3	酸味	4	旨味	2	甘味	4	甘味	5	塩味	2	酸味	5	塩味	2	塩味	3	旨味	4	酸味
2020-12-09 13:27:38	同意する	15〜19歳	男性	診断なし（概ね定型発達）		関東	酸味	5	苦味	5	塩味	2	塩味	3	苦味	2	甘味	3	旨味	2	塩味	4	酸味	4	苦味	4	苦味	3	甘味	3	塩味	3	酸味	1	旨味	2	甘味	4	旨味	2	酸味	4	塩味	2	旨味	1	旨味	1	塩味
2020-12-09 13:28:55	同意する	15〜19歳	男性	診断なし（概ね定型発達）		中部	酸味	4	苦味	4	塩味	2	塩味	2	苦味	3	旨味	1	甘味	5	酸味	3	酸味	4	甘味	4	苦味	2	甘味	1	苦味	1	旨味	1	苦味	4	甘味	4	旨味	1	酸味	5	塩味	1	旨味	2	酸味	3	塩味
2020-12-09 13:37:28	同意する	15〜19歳	男性	診断なし（概ね定型発達）		中部	酸味	3	苦味	3	旨味	1	塩味	2	苦味	3	旨味	1	甘味	3	塩味	3	酸味	3	甘味	2	塩味	1	甘味	3	酸味	2	塩味	3	塩味	3	甘味	3	甘味	4	塩味	3	塩味	3	旨味	3	旨味	1	苦味
2020-12-09 13:48:45	同意する	15〜19歳	女性	診断なし（概ね定型発達）		関東	酸味	3	苦味	3	甘味	3	塩味	4	苦味	3	旨味	3	甘味	4	塩味	4	甘味	4	苦味	2	苦味	2	旨味	3	塩味	2	塩味	3	酸味	2	甘味	4	旨味	4	酸味	4	旨味	3	旨味	3	旨味	2	苦味
2020-12-09 13:51:33	同意する	15〜19歳	男性	診断なし（概ね定型発達）		関東	酸味	4	苦味	4	旨味	4	塩味	2	塩味	2	旨味	4	甘味	3	塩味	3	旨味	3	苦味	2	苦味	3	甘味	3	酸味	3	塩味	2	酸味	1	甘味	3	甘味	3	酸味	2	旨味	3	甘味	4	酸味	3	旨味
2020-12-09 13:52:06	同意する	15〜19歳	男性	診断なし（概ね定型発達）		関東	酸味	5	苦味	3	酸味	4	塩味	4	苦味	2	旨味	4	甘味	4	甘味	5	酸味	3	苦味	4	苦味	3	酸味	2	酸味	1	塩味	1	旨味	3	甘味	4	甘味	4	苦味	3	苦味	2	旨味	1	旨味	2	酸味
2020-12-09 13:59:10	同意する	15〜19歳	男性	診断なし（概ね定型発達）		四国	旨味	3	苦味	4	甘味	2	苦味	4	苦味	1	旨味	2	甘味	4	塩味	4	旨味	2	酸味	2	塩味	3	旨味	3	酸味	4	塩味	2	旨味	1	甘味	4	塩味	1	酸味	3	塩味	3	旨味	2	塩味	2	酸味
2020-12-09 14:13:37	同意する	15〜19歳	女性	診断なし（概ね定型発達）		関東	酸味	5	苦味	4	旨味	3	旨味	1	苦味	2	旨味	4	甘味	4	塩味	3	旨味	5	旨味	4	苦味	2	旨味	5	塩味	4	甘味	4	酸味	4	旨味	3	旨味	1	酸味	5	苦味	2	甘味	5	酸味	2	塩味
2020-12-09 14:15:25	同意する	20〜29歳	男性	診断なし（概ね定型発達）		中国	酸味	5	苦味	5	甘味	4	苦味	1	塩味	1	旨味	3	甘味	4	塩味	1	酸味	5	苦味	5	塩味	1	甘味	3	塩味	4	塩味	1	甘味	1	甘味	3	甘味	4	酸味	4	塩味	3	旨味	1	酸味	2	旨味
2020-12-09 14:56:54	同意する	15〜19歳	男性	診断なし（概ね定型発達）		関東	酸味	4	苦味	5	旨味	3	塩味	4	苦味	3	苦味	3	甘味	5	塩味	4	旨味	4	苦味	5	塩味	4	甘味	4	塩味	3	旨味	3	旨味	4	甘味	4	甘味	4	酸味	4	苦味	4	甘味	4	旨味	4	甘味
2020-12-09 15:29:12	同意する	20〜29歳	男性	診断なし（概ね定型発達）		関東	酸味	4	苦味	2	甘味	3	塩味	3	苦味	2	旨味	3	塩味	3	甘味	4	旨味	4	苦味	2	塩味	3	甘味	2	酸味	2	塩味	2	酸味	3	甘味	4	苦味	3	酸味	5	旨味	3	甘味	2	塩味	1	苦味
2020-12-09 18:29:39	同意する	15〜19歳	男性	診断なし（概ね定型発達）		関東	酸味	4	旨味	2	酸味	5	苦味	3	苦味	5	酸味	4	旨味	4	甘味	4	酸味	4	塩味	2	塩味	2	旨味	2	酸味	4	苦味	1	旨味	4	甘味	5	甘味	2	酸味	5	塩味	1	苦味	3	甘味	2	旨味
2020-12-09 18:53:53	同意する	15〜19歳	男性	診断なし（概ね定型発達）		関東	酸味	4	苦味	5	甘味	2	塩味	4	苦味	1	苦味	4	旨味	4	塩味	3	甘味	3	苦味	3	苦味	2	旨味	3	塩味	3	苦味	3	旨味	4	旨味	3	甘味	3	塩味	4	塩味	3	旨味	2	甘味	2	苦味
2020-12-10 00:55:58	同意する	15〜19歳	男性	診断なし（概ね定型発達）		近畿	酸味	2	苦味	2	塩味	1	塩味	5	苦味	2	酸味	2	甘味	5	旨味	4	酸味	2	甘味	1	塩味	1	旨味	4	塩味	4	苦味	2	酸味	2	甘味	5	旨味	5	酸味	5	酸味	2	苦味	1	塩味	1	旨味
2020-12-10 16:29:06	同意する	15〜19歳	男性	診断なし（概ね定型発達）		近畿	酸味	5	苦味	5	甘味	3	苦味	2	苦味	4	塩味	3	甘味	4	塩味	5	旨味	3	苦味	4	苦味	3	甘味	3	塩味	3	苦味	2	旨味	2	甘味	4	苦味	2	酸味	4	塩味	3	甘味	2	塩味	2	塩味
2020-12-15 15:46:48	同意する	15〜19歳	男性	診断なし（概ね定型発達）		関東	酸味	2	苦味	3	酸味	1	苦味	4	苦味	2	旨味	1	甘味	3	旨味	2	塩味	2	苦味	4	酸味	1	甘味	1	酸味	1	塩味	1	苦味	1	甘味	2	甘味	2	酸味	2	旨味	1	苦味	1	甘味	1	塩味
2020-12-15 17:20:09	同意する	15〜19歳	男性	診断なし（概ね定型発達）		関東	酸味	2	旨味	2	塩味	2	旨味	2	苦味	2	旨味	2	旨味	2	酸味	2	酸味	2	塩味	2	苦味	2	塩味	3	酸味	3	塩味	3	酸味	3	酸味	3	甘味	3	酸味	3	旨味	3	旨味	5	塩味	5	苦味
2020-12-15 20:21:14	同意する	20〜29歳	男性	知的障害		関東	酸味	4	甘味	5	塩味	5	旨味	3	苦味	3	塩味	4	甘味	5	塩味	5	酸味	4	旨味	4	苦味	2	塩味	2	苦味	1	酸味	1	塩味	3	甘味	4	塩味	3	酸味	4	苦味	1	苦味	2	旨味	1	甘味
2020-12-15 23:07:29	同意する	15〜19歳	男性	診断なし（概ね定型発達）		関東	酸味	4	苦味	5	旨味	3	塩味	4	苦味	3	旨味	4	甘味	5	塩味	4	旨味	4	苦味	4	苦味	3	甘味	3	苦味	3	塩味	4	旨味	4	甘味	4	旨味	4	苦味	4	塩味	3	旨味	3	酸味	2	酸味
2020-12-19 17:01:57	同意する	20〜29歳	女性	診断なし（概ね定型発達）		関東	酸味	3	苦味	3	甘味	2	苦味	3	苦味	2	旨味	3	甘味	4	塩味	3	甘味	3	甘味	3	塩味	2	甘味	2	酸味	3	旨味	3	酸味	3	甘味	4	甘味	3	酸味	3	旨味	3	甘味	3	甘味	3	塩味
2021-02-13 15:08:33	同意する	50〜59歳	女性	診断なし（概ね定型発達）		関東	苦味	1	苦味	2	塩味	1	塩味	2	苦味	1	甘味	1	旨味	2	塩味	2	酸味	1	苦味	1	苦味	1	甘味	1	塩味	1	酸味	1	旨味	1	甘味	2	旨味	1	苦味	1	塩味	1	旨味	1	酸味	1	酸味
2021-02-18 17:04:57	同意する	40〜49歳	女性	診断なし（概ね定型発達）		近畿	塩味	2	苦味	2	甘味	2	酸味	2	苦味	4	甘味	2	甘味	2	旨味	2	塩味	2	酸味	2	苦味	2	旨味	2	酸味	2	塩味	2	旨味	2	甘味	2	旨味	2	酸味	2	塩味	2	甘味	2	苦味	2	苦味
2021-03-29 14:00:19	同意する	20〜29歳	女性	診断なし（概ね定型発達）		中国	酸味	3	苦味	3	旨味	2	塩味	2	苦味	1	旨味	1	甘味	3	塩味	1	酸味	1	苦味	1	苦味	1	甘味	3	酸味	3	旨味	3	酸味	3	甘味	3	旨味	3	酸味	3	旨味	1	甘味	2	甘味	1	苦味
2021-03-29 14:55:38	同意する	20〜29歳	女性	診断なし（概ね定型発達）		関東	酸味	5	苦味	5	旨味	5	塩味	5	苦味	5	旨味	5	甘味	5	甘味	5	酸味	5	苦味	5	塩味	5	甘味	4	塩味	4	旨味	5	酸味	5	甘味	5	甘味	5	酸味	5	苦味	5	甘味	5	塩味	5	苦味
2021-03-29 16:45:40	同意する	20〜29歳	女性	診断なし（概ね定型発達）		関東	酸味	4	甘味	3	甘味	3	塩味	4	苦味	4	苦味	3	甘味	5	甘味	4	酸味	4	甘味	4	苦味	3	甘味	4	酸味	4	苦味	3	酸味	5	甘味	5	旨味	4	酸味	5	塩味	3	旨味	3	塩味	3	塩味
2021-03-29 21:44:54	同意する	20〜29歳	女性	診断なし（概ね定型発達）		関東	酸味	4	苦味	3	甘味	3	酸味	4	塩味	2	酸味	2	甘味	5	塩味	5	旨味	3	苦味	3	塩味	3	旨味	3	塩味	3	旨味	3	酸味	2	甘味	5	甘味	5	酸味	2	旨味	3	旨味	3	甘味	3	塩味
2021-03-30 11:52:26	同意する	20〜29歳	女性	診断なし（概ね定型発達）		関東	酸味	3	苦味	3	旨味	2	塩味	2	苦味	2	旨味	2	甘味	2	塩味	2	旨味	3	苦味	2	苦味	2	旨味	3	酸味	2	塩味	2	旨味	3	甘味	3	甘味	2	酸味	3	塩味	2	旨味	2	苦味	2	苦味
2021-04-01 03:38:42	同意する	20〜29歳	男性	不明（未診断・疑うを含む）	今後診断結果が出る予定	九州・沖縄	酸味	4	苦味	3	旨味	2	苦味	3	旨味	2	旨味	4	甘味	4	苦味	2	甘味	4	甘味	3	旨味	2	甘味	2	旨味	2	甘味	3	苦味	4	甘味	4	甘味	4	苦味	4	甘味	2	甘味	1	甘味	1	苦味
2021-04-01 11:47:24	同意する	15〜19歳	男性	診断なし（概ね定型発達）		関東	酸味	5	苦味	4	酸味	2	塩味	3	旨味	2	酸味	4	甘味	4	塩味	3	甘味	4	旨味	2	苦味	4	甘味	4	酸味	4	塩味	4	酸味	4	甘味	4	甘味	4	酸味	5	塩味	4	甘味	4	旨味	2	苦味
2021-04-06 15:05:29	同意する	30〜39歳	男性	自閉症スペクトラム症（自閉症・アスベルガー症候群・広汎性発達障害を含む）		中部	酸味	5	苦味	5	旨味	2	苦味	4	苦味	5	甘味	4	甘味	5	塩味	4	甘味	5	酸味	3	苦味	2	甘味	4	塩味	4	旨味	2	甘味	5	甘味	5	甘味	5	酸味	4	甘味	3	甘味	3	甘味	1	甘味
2021-04-06 20:36:09	同意する	20〜29歳	女性	診断なし（概ね定型発達）		東北	酸味	4	苦味	3	甘味	2	塩味	1	苦味	2	旨味	4	甘味	5	塩味	4	塩味	1	甘味	3	苦味	4	甘味	5	酸味	3	塩味	2	酸味	4	甘味	5	甘味	5	酸味	4	塩味	3	甘味	4	塩味	1	苦味
2021-04-30 16:25:55	同意する	20〜29歳	女性	診断なし（概ね定型発達）		中部	酸味	5	苦味	3	旨味	1	塩味	1	苦味	3	苦味	1	甘味	5	塩味	5	甘味	5	苦味	3	酸味	3	塩味	3	酸味	2	旨味	1	旨味	5	甘味	5	甘味	5	酸味	5	旨味	3	酸味	2	甘味	4	旨味
[truncated: 50 more columns]
